# Supplementary material for: Traditional Old Dietary Pattern of Castellana Grotte (Apulia) Is Associated with Healthy Outcomes
Source: PubMed Central journal article supplement (PMC7600964; doi:10.3390/nu12103097), 2020-10-12
Supplement: nutrients-12-03097-s001.pdf [file nutrients-12-03097-s001.pdf]

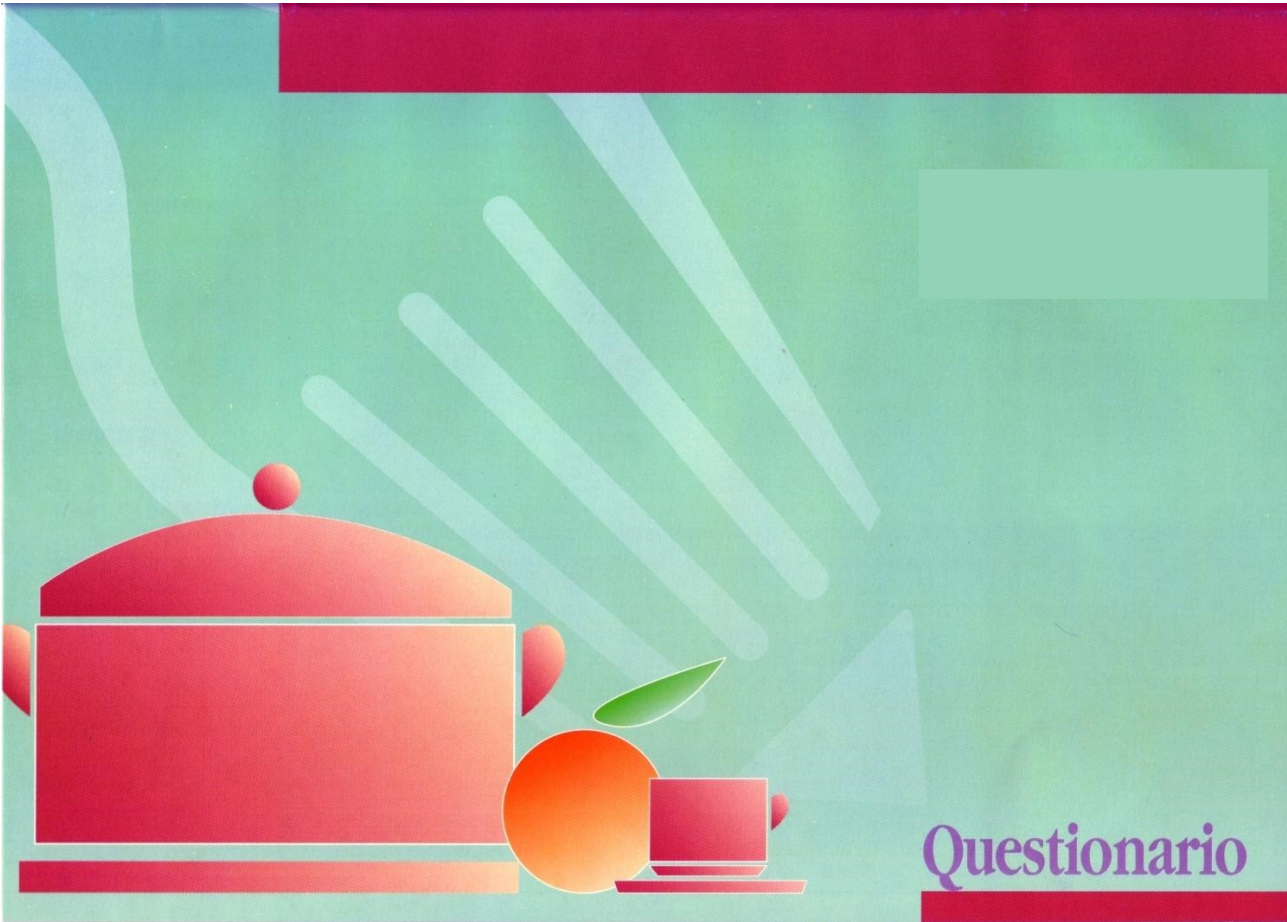

Questionario

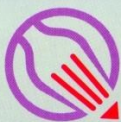

Gentile Signore/a,

**l'obiettivo del questionario è raccogliere informazioni sulle abitudini di vita della nostra popolazione per studiare se esse possono causare o prevenire alcune importanti malattie, in particolare i tumori.**

**Ci preme sottolineare che questa ricerca è stata richiesta e finanziata dal Ministero della Sanità.**

**Ti chiediamo gentilmente di rispondere alle seguenti domande.**

**Tutte le risposte che cortesemente ci fornirai rimarranno assolutamente riservate.**

- 1** Prima di rispondere alle domande previste prendi visione di tutto il questionario.
- 2** Rispondi a tutte le domande previste. A seconda dei casi o scrivi la risposta sul rigo oppure indica con una croce (X) il quadratino della risposta prescelta, anche se la risposta è **NO** o **MAI**.
- 3** Se ti accorgi di aver sbagliato, cancella con la penna la risposta errata e riscrivi quella esatta.

Se hai difficoltà nella compilazione del questionario, per favore non rinunciare! Fatti aiutare da un parente, da un amico o da un vicino di casa. In casi estremi, potresti anche chiedere aiuto al tuo medico di famiglia, se lui è d'accordo ed ha tempo per questo.  
Per qualunque informazione, siamo disponibili al numero telefonico seguente: (080)8961394 dalle ore 9 alle 13, tutti i giorni escluso il sabato.

## *dati anagrafici*

**1**

**DATA DI  
COMPILAZIONE**

giorno \_\_\_\_\_ mese \_\_\_\_\_ anno \_\_\_\_\_

**COGNOME**

\_\_\_\_\_ **NOME** \_\_\_\_\_

**SESSO**

maschio  femmina

**INDIRIZZO**

Via \_\_\_\_\_ Città \_\_\_\_\_ tel. \_\_\_\_\_

**DATA DI NASCITA**

\_\_\_\_\_ **ETA'** \_\_\_\_\_

**COGNOME E NOME  
DEL TUO MEDICO  
DI FAMIGLIA**

\_\_\_\_\_

**SE HAI RICEVUTO QUESTO QUESTIONARIO IN OCCASIONE DI UNA VISITA PRESSO L'AMBULATORIO DEL TUO MEDICO CURANTE O DI UN PRELIEVO DI SANGUE PRESSO UN LABORATORIO DI ANALISI, PER FAVORE INDICA IL MOTIVO DEL TUO RICORSO AL SERVIZIO SANITARIO**

\_\_\_\_\_  
\_\_\_\_\_  
\_\_\_\_\_



**QUAL È IL TUO TITOLO DI STUDIO?**

nessuno  licenza elementare  licenza media  diploma  laurea

**CHE ATTIVITA' LAVORATIVA SVOLGI ATTUALMENTE? indica anche se sei pensionato, casalinga o disoccupato**

\_\_\_\_\_ Da quanti anni? \_\_\_\_\_

Se attualmente sei occupato, per quanti giorni lavori alla settimana? \_\_\_\_\_

Quante ore lavori al giorno? \_\_\_\_\_

Il lavoro che svolgi è soggetto a turni? NO  SI

**IN PASSATO HAI SVOLTO UNA ATTIVITA' LAVORATIVA DIVERSA DA QUELLA ATTUALE?**

NO  SI  **SE SI**, specificare quale: \_\_\_\_\_

**INDICA SE SEI**

celibe o nubile  sposato o convivente  separato o divorziato  vedovo

**SOFFRI O HAI MAI SOFFERTO DELLE SEGUENTI MALATTIE? (rispondi NO o SI a tutte le malattie indicate)**

DIABETE NO  SI

PRESSIONE ALTA NO  SI

GRASSI ELEVATI NEL SANGUE (colesterolo, trigliceridi) NO  SI

ACIDO URICO ELEVATO NEL SANGUE NO  SI

EMORRAGIA O TROMBOSI AL CERVELLO NO  SI

INFARTO DI CUORE NO  SI

CALCOLI RENALI NO  SI

BRONCHITE CRONICA NO  SI

MALATTIE DEL FEGATO (epatite cronica, cirrosi) NO  SI

CALCOLI ALLA COLECISTI NO  SI

ULCERA ALLO STOMACO o DUODENALE NO  SI

POLIPOLI ALL'INTESTINO NO  SI

TUMORE NO  SI

sede del tumore \_\_\_\_\_

ALTRE MALATTIE \_\_\_\_\_

**HAI MAI SUBITO OPERAZIONI CHIRURGICHE?**

NO  SI

**SE SI**, per quale malattia? \_\_\_\_\_ in che anno? \_\_\_\_\_

\_\_\_\_\_

\_\_\_\_\_

\_\_\_\_\_

**HAI ALMENO UN PARENTE DI PRIMO GRADO (padre, madre, sorelle, fratelli, figli) CHE HA AVUTO UN TUMORE?**

NO  SI  NON SO

**SE SI**, indica quale dei tuoi parenti di primo grado ha avuto un tumore \_\_\_\_\_ sede del tumore \_\_\_\_\_

\_\_\_\_\_

\_\_\_\_\_

\_\_\_\_\_



**ATTUALMENTE PRENDI FARMACI PER LA CURA DI QUALCHE MALATTIA?**

NO  SI

SE SÌ, indica il nome delle medicine che prendi

\_\_\_\_\_

\_\_\_\_\_

\_\_\_\_\_

**ATTUALMENTE PRENDI VITAMINE?**

NO  SI

SE SÌ, indica il nome delle vitamine che prendi

\_\_\_\_\_

\_\_\_\_\_

\_\_\_\_\_

**ATTUALMENTE FUMI SIGARETTE?**

NO  SI

SE SÌ, quante ne fumi al giorno? \_\_\_\_\_

Da quanto tempo fumi? \_\_\_\_\_

**SE NON FUMI ATTUALMENTE, IN PASSATO FUMAVI?**

NO  SI

SE SÌ, quante ne fumavi al giorno? \_\_\_\_\_

Per quanti anni hai fumato? \_\_\_\_\_

**CON CHE FREQUENZA VAI DI CORPO ABITUALMENTE?**

più di 2 volte al giorno

1 - 2 volte al giorno

1 volta ogni 2 - 3 giorni

meno di 1 volta ogni 3 giorni

**FAI USO ABITUALE DI LASSATIVI?**

NO  SI

SE SÌ, quante volte al mese? \_\_\_\_\_

**QUAL È LA TUA ALTEZZA?**

cm. \_\_\_\_\_

**QUAL È IL TUO PESO ATTUALE ?**

Kg. \_\_\_\_\_

**UN ANNO FA, RISPETTO AL TUO PESO ATTUALE:**

avevi lo stesso peso

pesavi di meno

pesavi di più

Se pesavi di meno o di più, quanti Kg. pesavi? \_\_\_\_\_

**ATTUALMENTE SEGUI UNA DIETA PARTICOLARE?**

NO  SI

SE SÌ, quale delle seguenti diete? (rispondi NO o SÌ a tutte le diete sottoelencate)

dieta dimagrante

NO  SI

SE SÌ, da quanto tempo? \_\_\_\_\_

dieta per diabete (pochi zuccheri)

NO  SI

SE SÌ, da quanto tempo? \_\_\_\_\_

dieta per grassi elevati nel sangue (pochi grassi)

NO  SI

SE SÌ, da quanto tempo? \_\_\_\_\_

dieta per pressione alta (poco sale)

NO  SI

SE SÌ, da quanto tempo? \_\_\_\_\_

dieta per acido urico elevato nel sangue (poche proteine)

NO  SI

SE SÌ, da quanto tempo? \_\_\_\_\_

altre diete \_\_\_\_\_

SE SÌ, da quanto tempo? \_\_\_\_\_

**HAI PROBLEMI A MASTICARE?**

NO  SI

SE SÌ, perché hai problemi di denti?

NO  SI

SE SÌ, da quanti anni? \_\_\_\_\_

**SOLO PER LE DONNE**

**ATTUALMENTE SEI IN MENOPAUSA?**

NO  SI



istruzioni

Le successive domande si riferiscono alle tue abitudini alimentari.

- 1 Le tue risposte devono fare riferimento alla alimentazione da te seguita nell'anno precedente la compilazione di questo questionario (ovvero l'anno passato!). Se hai cambiato l'alimentazione da meno di un anno (per esempio perché segui una dieta dimagrante o a causa di una malattia) devi riferirti alle tue nuove abitudini alimentari.
- 2 Per ogni cibo o gruppo di cibi elencati ti chiediamo di indicare con una croce (X):  
 - quante volte hai mangiato in media quel cibo o gruppo di cibi lo scorso anno (frequenza);  
 - quanto è grande la quantità che di solito mangi per pasto di quel determinato cibo (porzione).  
 Indica sempre una sola risposta per la frequenza ed una sola risposta per la porzione.
- 3 Per gli alimenti che si mangiano solo in un particolare periodo dell'anno (per esempio l'anguria in estate) la frequenza e la porzione devono riferirsi a quel periodo. Questi cibi sono indicati nel questionario con la frase "quando è il periodo".
- 4 Non è necessario indicare la porzione in questi due casi:  
 - quando non è richiesto e non ci sono quindi le caselle apposite (come per esempio per la "focaccia"),  
 oppure  
 - se hai risposto MAI alla domanda sulla frequenza.

Nella pagina seguente sono riportati degli esempi.

Compilare il questionario è facile! Stai attento però a non commettere questi errori.

QUANTE VOLTE HAI MANGIATO IN MEDIA I SEGUENTI CIBI LO SCORSO ANNO?

QUANTO È GRANDE LA PORZIONE DI CIBO CHE DI SOLITO MANGI PER PASTO?

|            | MAI                                                                                                                            | MENO DI 1 VOLTA AL MESE             | 1-3 VOLTE AL MESE                   | 1 VOLTA ALLA SETT.                  | 2-3 VOLTE ALLA SETT.     | 4-6 VOLTE ALLA SETT.     | 1 VOLTA AL DI'           | PIU' DI 1 VOLTA AL DI'   | 1-2 BOCCONCINI o 1/2 treccia        | 3-4 BOCCONCINI o 1 treccia          | 5 BOCCONCINI o più di 1 treccia |
|------------|--------------------------------------------------------------------------------------------------------------------------------|-------------------------------------|-------------------------------------|-------------------------------------|--------------------------|--------------------------|--------------------------|--------------------------|-------------------------------------|-------------------------------------|---------------------------------|
| MOZZARELLA | <input type="checkbox"/>                                                                                                       | <input checked="" type="checkbox"/> | <input type="checkbox"/>            | <input checked="" type="checkbox"/> | <input type="checkbox"/> | <input type="checkbox"/> | <input type="checkbox"/> | <input type="checkbox"/> | <input type="checkbox"/>            | <input checked="" type="checkbox"/> | <input type="checkbox"/>        |
|            | ERRATO, perché non devi sbarrare la frequenza più di una volta                                                                 |                                     |                                     |                                     |                          |                          |                          |                          |                                     |                                     |                                 |
| MOZZARELLA | <input checked="" type="checkbox"/>                                                                                            | <input type="checkbox"/>            | <input type="checkbox"/>            | <input type="checkbox"/>            | <input type="checkbox"/> | <input type="checkbox"/> | <input type="checkbox"/> | <input type="checkbox"/> | <input checked="" type="checkbox"/> | <input type="checkbox"/>            | <input type="checkbox"/>        |
|            | ERRATO, perché se sbarrì la casella MAI e quindi dici di non mangiare mai l'alimento, ovviamente non devi sbarrare la porzione |                                     |                                     |                                     |                          |                          |                          |                          |                                     |                                     |                                 |
| MOZZARELLA | <input type="checkbox"/>                                                                                                       | <input type="checkbox"/>            | <input type="checkbox"/>            | <input type="checkbox"/>            | <input type="checkbox"/> | <input type="checkbox"/> | <input type="checkbox"/> | <input type="checkbox"/> | <input type="checkbox"/>            | <input type="checkbox"/>            | <input type="checkbox"/>        |
|            | ERRATO, perché se non mangi mai l'alimento non devi lasciare in bianco la risposta ma devi sbarrare la casella MAI             |                                     |                                     |                                     |                          |                          |                          |                          |                                     |                                     |                                 |
| MOZZARELLA | <input type="checkbox"/>                                                                                                       | <input type="checkbox"/>            | <input checked="" type="checkbox"/> | <input type="checkbox"/>            | <input type="checkbox"/> | <input type="checkbox"/> | <input type="checkbox"/> | <input type="checkbox"/> | <input type="checkbox"/>            | <input type="checkbox"/>            | <input type="checkbox"/>        |
|            | ERRATO, perché se mangi un alimento devi indicare oltre la porzione anche la frequenza                                         |                                     |                                     |                                     |                          |                          |                          |                          |                                     |                                     |                                 |



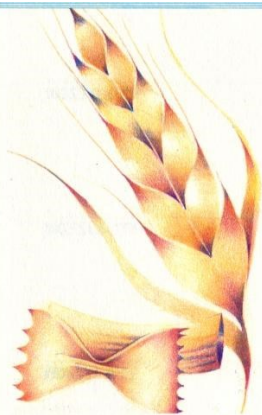

QUANTE VOLTE HAI MANGIATO IN MEDIA I SEGUENTI CIBI LO SCORSO ANNO?

QUANTO È GRANDE LA PORZIONE DI CIBO CHE DI SOLITO MANGI PER PASTO?

MAI  
MENO DI 1 VOLTA AL MESE  
1-3 VOLTE AL MESE  
1 VOLTA ALLA SETT.  
2-3 VOLTE ALLA SETT.  
4-6 VOLTE ALLA SETT.  
1 VOLTA AL DI'  
PIU' DI 1 VOLTA AL DI'

FONDO DEL PIATTO  
PIATTO INTERO  
PIATTO ABBONDANTE

|                         | MAI                      | MENO DI 1 VOLTA AL MESE  | 1-3 VOLTE AL MESE        | 1 VOLTA ALLA SETT.       | 2-3 VOLTE ALLA SETT.     | 4-6 VOLTE ALLA SETT.     | 1 VOLTA AL DI'           | PIU' DI 1 VOLTA AL DI'   | FONDO DEL PIATTO         | PIATTO INTERO            | PIATTO ABBONDANTE        |
|-------------------------|--------------------------|--------------------------|--------------------------|--------------------------|--------------------------|--------------------------|--------------------------|--------------------------|--------------------------|--------------------------|--------------------------|
| PASTA ASCIUTTA          | <input type="checkbox"/> | <input type="checkbox"/> | <input type="checkbox"/> | <input type="checkbox"/> | <input type="checkbox"/> | <input type="checkbox"/> | <input type="checkbox"/> | <input type="checkbox"/> | <input type="checkbox"/> | <input type="checkbox"/> | <input type="checkbox"/> |
| RISO DA SOLO O RISOTTI  | <input type="checkbox"/> | <input type="checkbox"/> | <input type="checkbox"/> | <input type="checkbox"/> | <input type="checkbox"/> | <input type="checkbox"/> | <input type="checkbox"/> | <input type="checkbox"/> | <input type="checkbox"/> | <input type="checkbox"/> | <input type="checkbox"/> |
| PASTINA O RISO IN BRODO | <input type="checkbox"/> | <input type="checkbox"/> | <input type="checkbox"/> | <input type="checkbox"/> | <input type="checkbox"/> | <input type="checkbox"/> | <input type="checkbox"/> | <input type="checkbox"/> | <input type="checkbox"/> | <input type="checkbox"/> | <input type="checkbox"/> |
|                         |                          |                          |                          |                          |                          |                          |                          |                          |                          |                          |                          |
| PANE                    | <input type="checkbox"/> | <input type="checkbox"/> | <input type="checkbox"/> | <input type="checkbox"/> | <input type="checkbox"/> | <input type="checkbox"/> | <input type="checkbox"/> | <input type="checkbox"/> | <input type="checkbox"/> | <input type="checkbox"/> | <input type="checkbox"/> |
| FOCACCIA                | <input type="checkbox"/> | <input type="checkbox"/> | <input type="checkbox"/> | <input type="checkbox"/> | <input type="checkbox"/> | <input type="checkbox"/> | <input type="checkbox"/> | <input type="checkbox"/> |                          |                          |                          |
| PIZZA                   | <input type="checkbox"/> | <input type="checkbox"/> | <input type="checkbox"/> | <input type="checkbox"/> | <input type="checkbox"/> | <input type="checkbox"/> | <input type="checkbox"/> | <input type="checkbox"/> |                          |                          |                          |

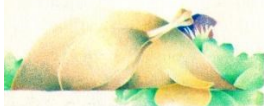

QUANTE VOLTE HAI MANGIATO IN MEDIA I SEGUENTI CIBI LO SCORSO ANNO?

QUANTO È GRANDE LA PORZIONE DI CIBO CHE DI SOLITO MANGI PER PASTO?

MAI  
MENO DI 1 VOLTA AL MESE  
1-3 VOLTE AL MESE  
1 VOLTA ALLA SETT.  
2-3 VOLTE ALLA SETT.  
4-6 VOLTE ALLA SETT.  
1 VOLTA AL DI'  
PIU' DI 1 VOLTA AL DI'

MENO DEL FONDO DEL PIATTO  
FONDO DEL PIATTO  
PIU' DEL FONDO DEL PIATTO

|                  | MAI                      | MENO DI 1 VOLTA AL MESE  | 1-3 VOLTE AL MESE        | 1 VOLTA ALLA SETT.       | 2-3 VOLTE ALLA SETT.     | 4-6 VOLTE ALLA SETT.     | 1 VOLTA AL DI'           | PIU' DI 1 VOLTA AL DI'   | MENO DEL FONDO DEL PIATTO             | FONDO DEL PIATTO              | PIU' DEL FONDO DEL PIATTO                    |
|------------------|--------------------------|--------------------------|--------------------------|--------------------------|--------------------------|--------------------------|--------------------------|--------------------------|---------------------------------------|-------------------------------|----------------------------------------------|
| VITELLO          | <input type="checkbox"/> | <input type="checkbox"/> | <input type="checkbox"/> | <input type="checkbox"/> | <input type="checkbox"/> | <input type="checkbox"/> | <input type="checkbox"/> | <input type="checkbox"/> | <input type="checkbox"/>              | <input type="checkbox"/>      | <input type="checkbox"/>                     |
| CAVALLO          | <input type="checkbox"/> | <input type="checkbox"/> | <input type="checkbox"/> | <input type="checkbox"/> | <input type="checkbox"/> | <input type="checkbox"/> | <input type="checkbox"/> | <input type="checkbox"/> | <input type="checkbox"/>              | <input type="checkbox"/>      | <input type="checkbox"/>                     |
| MAIALE           | <input type="checkbox"/> | <input type="checkbox"/> | <input type="checkbox"/> | <input type="checkbox"/> | <input type="checkbox"/> | <input type="checkbox"/> | <input type="checkbox"/> | <input type="checkbox"/> | <input type="checkbox"/>              | <input type="checkbox"/>      | <input type="checkbox"/>                     |
| FEGATO           | <input type="checkbox"/> | <input type="checkbox"/> | <input type="checkbox"/> | <input type="checkbox"/> | <input type="checkbox"/> | <input type="checkbox"/> | <input type="checkbox"/> | <input type="checkbox"/> | <input type="checkbox"/>              | <input type="checkbox"/>      | <input type="checkbox"/>                     |
| POLLO            | <input type="checkbox"/> | <input type="checkbox"/> | <input type="checkbox"/> | <input type="checkbox"/> | <input type="checkbox"/> | <input type="checkbox"/> | <input type="checkbox"/> | <input type="checkbox"/> | MENO DI 1 COSCIA o 1 fettina di petto | 1 COSCIA o 2 fettine di petto | PIU' DI 1 COSCIA o più di 2 fettine di petto |
| CONIGLIO         | <input type="checkbox"/> | <input type="checkbox"/> | <input type="checkbox"/> | <input type="checkbox"/> | <input type="checkbox"/> | <input type="checkbox"/> | <input type="checkbox"/> | <input type="checkbox"/> | 1 PEZZO                               | 2-3 PEZZI                     | PIU' DI 3 PEZZI                              |
| AGNELLO          | <input type="checkbox"/> | <input type="checkbox"/> | <input type="checkbox"/> | <input type="checkbox"/> | <input type="checkbox"/> | <input type="checkbox"/> | <input type="checkbox"/> | <input type="checkbox"/> | 1 PEZZO                               | 2-3 PEZZI                     | PIU' DI 3 PEZZI                              |
| SALSICCIA FRESCA | <input type="checkbox"/> | <input type="checkbox"/> | <input type="checkbox"/> | <input type="checkbox"/> | <input type="checkbox"/> | <input type="checkbox"/> | <input type="checkbox"/> | <input type="checkbox"/> | 1-2 PEZZI                             | 3-4 PEZZI                     | PIU' DI 4 PEZZI                              |







## latte e derivati del latte

12

QUANTE VOLTE HAI MANGIATO IN MEDIA I SEGUENTI CIBI LO SCORSO ANNO?

QUANTO È GRANDE LA PORZIONE DI CIBO CHE DI SOLITO MANGI PER PASTO?

|                                                              | MAI                      | MENO DI 1 VOLTA AL MESE  | 1-3 VOLTE AL MESE        | 1 VOLTA ALLA SETT.       | 2-3 VOLTE ALLA SETT.     | 4-6 VOLTE ALLA SETT.     | 1 VOLTA AL DI'           | PIU' DI 1 VOLTA AL DI'   |                                      |
|--------------------------------------------------------------|--------------------------|--------------------------|--------------------------|--------------------------|--------------------------|--------------------------|--------------------------|--------------------------|--------------------------------------|
| LATTE INTERO (da solo o con caffè)                           | <input type="checkbox"/> | <input type="checkbox"/> | <input type="checkbox"/> | <input type="checkbox"/> | <input type="checkbox"/> | <input type="checkbox"/> | <input type="checkbox"/> | <input type="checkbox"/> | 1 TAZZA DA CAPPUCCINO (circa 100 cc) |
| LATTE SCREMATO - PARZIALMENTE SCREMATO (da solo o con caffè) | <input type="checkbox"/> | <input type="checkbox"/> | <input type="checkbox"/> | <input type="checkbox"/> | <input type="checkbox"/> | <input type="checkbox"/> | <input type="checkbox"/> | <input type="checkbox"/> | 1 TAZZA DA LATTE (circa 200 cc)      |
| YOGURT                                                       | <input type="checkbox"/> | <input type="checkbox"/> | <input type="checkbox"/> | <input type="checkbox"/> | <input type="checkbox"/> | <input type="checkbox"/> | <input type="checkbox"/> | <input type="checkbox"/> | 1 TAZZONE DA LATTE (circa 300 cc)    |
| RICOTTA                                                      | <input type="checkbox"/> | <input type="checkbox"/> | <input type="checkbox"/> | <input type="checkbox"/> | <input type="checkbox"/> | <input type="checkbox"/> | <input type="checkbox"/> | <input type="checkbox"/> | MENO DI 1/4 DI CESTELLO              |
| MOZZARELLA                                                   | <input type="checkbox"/> | <input type="checkbox"/> | <input type="checkbox"/> | <input type="checkbox"/> | <input type="checkbox"/> | <input type="checkbox"/> | <input type="checkbox"/> | <input type="checkbox"/> | 1/4 DI CESTELLO                      |
|                                                              |                          |                          |                          |                          |                          |                          |                          |                          | PIU' DI 1/4 DI CESTELLO              |
|                                                              |                          |                          |                          |                          |                          |                          |                          |                          | 1 - 2 BOCCONCINI o 1/2 treccia       |
|                                                              |                          |                          |                          |                          |                          |                          |                          |                          | 3 - 4 BOCCONCINI o 1 treccia         |
|                                                              |                          |                          |                          |                          |                          |                          |                          |                          | 5 BOCCONCINI o più di 1 treccia      |

## latte e derivati del latte

13

QUANTE VOLTE HAI MANGIATO IN MEDIA I SEGUENTI CIBI LO SCORSO ANNO?

QUANTO È GRANDE LA PORZIONE DI CIBO CHE DI SOLITO MANGI PER PASTO?

|                                          | MAI                      | MENO DI 1 VOLTA AL MESE  | 1-3 VOLTE AL MESE        | 1 VOLTA ALLA SETT.       | 2-3 VOLTE ALLA SETT.     | 4-6 VOLTE ALLA SETT.     | 1 VOLTA AL DI'           | PIU' DI 1 VOLTA AL DI'   |                     |
|------------------------------------------|--------------------------|--------------------------|--------------------------|--------------------------|--------------------------|--------------------------|--------------------------|--------------------------|---------------------|
| SCAMORZA                                 | <input type="checkbox"/> | <input type="checkbox"/> | <input type="checkbox"/> | <input type="checkbox"/> | <input type="checkbox"/> | <input type="checkbox"/> | <input type="checkbox"/> | <input type="checkbox"/> | MENO DI 1 FETTA     |
| CACIOTTINA FRESCA - STRACCHINO - FONTINA | <input type="checkbox"/> | <input type="checkbox"/> | <input type="checkbox"/> | <input type="checkbox"/> | <input type="checkbox"/> | <input type="checkbox"/> | <input type="checkbox"/> | <input type="checkbox"/> | 1 FETTA             |
| BEL PAESE - GORGONZOLA                   | <input type="checkbox"/> | <input type="checkbox"/> | <input type="checkbox"/> | <input type="checkbox"/> | <input type="checkbox"/> | <input type="checkbox"/> | <input type="checkbox"/> | <input type="checkbox"/> | 2 o PIU' FETTE      |
| PROVOLONE - CACIOCAVALLO                 | <input type="checkbox"/> | <input type="checkbox"/> | <input type="checkbox"/> | <input type="checkbox"/> | <input type="checkbox"/> | <input type="checkbox"/> | <input type="checkbox"/> | <input type="checkbox"/> |                     |
| GRANA - PARMIGIANO                       | <input type="checkbox"/> | <input type="checkbox"/> | <input type="checkbox"/> | <input type="checkbox"/> | <input type="checkbox"/> | <input type="checkbox"/> | <input type="checkbox"/> | <input type="checkbox"/> |                     |
| PECORINO - VACCHINO                      | <input type="checkbox"/> | <input type="checkbox"/> | <input type="checkbox"/> | <input type="checkbox"/> | <input type="checkbox"/> | <input type="checkbox"/> | <input type="checkbox"/> | <input type="checkbox"/> |                     |
| SVIZZERO                                 | <input type="checkbox"/> | <input type="checkbox"/> | <input type="checkbox"/> | <input type="checkbox"/> | <input type="checkbox"/> | <input type="checkbox"/> | <input type="checkbox"/> | <input type="checkbox"/> |                     |
| FORMAGGINO                               | <input type="checkbox"/> | <input type="checkbox"/> | <input type="checkbox"/> | <input type="checkbox"/> | <input type="checkbox"/> | <input type="checkbox"/> | <input type="checkbox"/> | <input type="checkbox"/> | 1 FORMAGGINO        |
|                                          |                          |                          |                          |                          |                          |                          |                          |                          | 2 FORMAGGINI        |
|                                          |                          |                          |                          |                          |                          |                          |                          |                          | 3 o PIU' FORMAGGINI |



## verdura e ortaggi

14

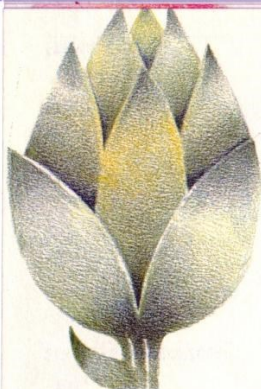

QUANTE VOLTE HAI MANGIATO IN MEDIA I SEGUENTI CIBI LO SCORSO ANNO?

QUANTO È GRANDE LA PORZIONE DI CIBO CHE DI SOLITO MANGI PER PASTO?

CAVOLI - CAVOLFIORI - CIME DI RAPE - RAPE quando è il periodo

| MAI                      | MENO DI 1 VOLTA AL MESE  | 1-3 VOLTE AL MESE        | 1 VOLTA ALLA SETT.       | 2-3 VOLTE ALLA SETT.     | 4-6 VOLTE ALLA SETT.     | 1 VOLTA AL DI'           | PIU' DI 1 VOLTA AL DI'   |
|--------------------------|--------------------------|--------------------------|--------------------------|--------------------------|--------------------------|--------------------------|--------------------------|
| <input type="checkbox"/> | <input type="checkbox"/> | <input type="checkbox"/> | <input type="checkbox"/> | <input type="checkbox"/> | <input type="checkbox"/> | <input type="checkbox"/> | <input type="checkbox"/> |

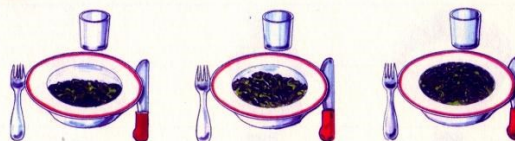

FONDO DEL PIATTO

PIATTO INTERO

PIATTO ABBONDANTE

CARCIOFI quando è il periodo

|                          |                          |                          |                          |                          |                          |                          |                          |
|--------------------------|--------------------------|--------------------------|--------------------------|--------------------------|--------------------------|--------------------------|--------------------------|
| <input type="checkbox"/> | <input type="checkbox"/> | <input type="checkbox"/> | <input type="checkbox"/> | <input type="checkbox"/> | <input type="checkbox"/> | <input type="checkbox"/> | <input type="checkbox"/> |
|--------------------------|--------------------------|--------------------------|--------------------------|--------------------------|--------------------------|--------------------------|--------------------------|

ZUCCHINE - MELANZANE quando è il periodo

|                          |                          |                          |                          |                          |                          |                          |                          |
|--------------------------|--------------------------|--------------------------|--------------------------|--------------------------|--------------------------|--------------------------|--------------------------|
| <input type="checkbox"/> | <input type="checkbox"/> | <input type="checkbox"/> | <input type="checkbox"/> | <input type="checkbox"/> | <input type="checkbox"/> | <input type="checkbox"/> | <input type="checkbox"/> |
|--------------------------|--------------------------|--------------------------|--------------------------|--------------------------|--------------------------|--------------------------|--------------------------|

SPINACI

|                          |                          |                          |                          |                          |                          |                          |                          |
|--------------------------|--------------------------|--------------------------|--------------------------|--------------------------|--------------------------|--------------------------|--------------------------|
| <input type="checkbox"/> | <input type="checkbox"/> | <input type="checkbox"/> | <input type="checkbox"/> | <input type="checkbox"/> | <input type="checkbox"/> | <input type="checkbox"/> | <input type="checkbox"/> |
|--------------------------|--------------------------|--------------------------|--------------------------|--------------------------|--------------------------|--------------------------|--------------------------|

BIETOLE - CICORIE

|                          |                          |                          |                          |                          |                          |                          |                          |
|--------------------------|--------------------------|--------------------------|--------------------------|--------------------------|--------------------------|--------------------------|--------------------------|
| <input type="checkbox"/> | <input type="checkbox"/> | <input type="checkbox"/> | <input type="checkbox"/> | <input type="checkbox"/> | <input type="checkbox"/> | <input type="checkbox"/> | <input type="checkbox"/> |
|--------------------------|--------------------------|--------------------------|--------------------------|--------------------------|--------------------------|--------------------------|--------------------------|

MINISTRONE

|                          |                          |                          |                          |                          |                          |                          |                          |
|--------------------------|--------------------------|--------------------------|--------------------------|--------------------------|--------------------------|--------------------------|--------------------------|
| <input type="checkbox"/> | <input type="checkbox"/> | <input type="checkbox"/> | <input type="checkbox"/> | <input type="checkbox"/> | <input type="checkbox"/> | <input type="checkbox"/> | <input type="checkbox"/> |
|--------------------------|--------------------------|--------------------------|--------------------------|--------------------------|--------------------------|--------------------------|--------------------------|

FINOCCHI - SEDANO quando è il periodo

|                          |                          |                          |                          |                          |                          |                          |                          |
|--------------------------|--------------------------|--------------------------|--------------------------|--------------------------|--------------------------|--------------------------|--------------------------|
| <input type="checkbox"/> | <input type="checkbox"/> | <input type="checkbox"/> | <input type="checkbox"/> | <input type="checkbox"/> | <input type="checkbox"/> | <input type="checkbox"/> | <input type="checkbox"/> |
|--------------------------|--------------------------|--------------------------|--------------------------|--------------------------|--------------------------|--------------------------|--------------------------|

CETRIOLI - COCOMERI quando è il periodo

|                          |                          |                          |                          |                          |                          |                          |                          |
|--------------------------|--------------------------|--------------------------|--------------------------|--------------------------|--------------------------|--------------------------|--------------------------|
| <input type="checkbox"/> | <input type="checkbox"/> | <input type="checkbox"/> | <input type="checkbox"/> | <input type="checkbox"/> | <input type="checkbox"/> | <input type="checkbox"/> | <input type="checkbox"/> |
|--------------------------|--------------------------|--------------------------|--------------------------|--------------------------|--------------------------|--------------------------|--------------------------|

META'

1 INTERO

1 e 1/2 o PIU'

META'

1 INTERO

1 e 1/2 o PIU'

## verdura e ortaggi

15

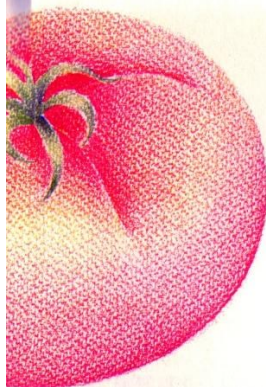

QUANTE VOLTE HAI MANGIATO IN MEDIA I SEGUENTI CIBI LO SCORSO ANNO?

QUANTO È GRANDE LA PORZIONE DI CIBO CHE DI SOLITO MANGI PER PASTO?

INSALATA

|                          |                          |                          |                          |                          |                          |                          |                          |
|--------------------------|--------------------------|--------------------------|--------------------------|--------------------------|--------------------------|--------------------------|--------------------------|
| <input type="checkbox"/> | <input type="checkbox"/> | <input type="checkbox"/> | <input type="checkbox"/> | <input type="checkbox"/> | <input type="checkbox"/> | <input type="checkbox"/> | <input type="checkbox"/> |
|--------------------------|--------------------------|--------------------------|--------------------------|--------------------------|--------------------------|--------------------------|--------------------------|

POMODORI (da soli o con l'insalata)

|                          |                          |                          |                          |                          |                          |                          |                          |
|--------------------------|--------------------------|--------------------------|--------------------------|--------------------------|--------------------------|--------------------------|--------------------------|
| <input type="checkbox"/> | <input type="checkbox"/> | <input type="checkbox"/> | <input type="checkbox"/> | <input type="checkbox"/> | <input type="checkbox"/> | <input type="checkbox"/> | <input type="checkbox"/> |
|--------------------------|--------------------------|--------------------------|--------------------------|--------------------------|--------------------------|--------------------------|--------------------------|

PATATE

|                          |                          |                          |                          |                          |                          |                          |                          |
|--------------------------|--------------------------|--------------------------|--------------------------|--------------------------|--------------------------|--------------------------|--------------------------|
| <input type="checkbox"/> | <input type="checkbox"/> | <input type="checkbox"/> | <input type="checkbox"/> | <input type="checkbox"/> | <input type="checkbox"/> | <input type="checkbox"/> | <input type="checkbox"/> |
|--------------------------|--------------------------|--------------------------|--------------------------|--------------------------|--------------------------|--------------------------|--------------------------|

CAROTE

|                          |                          |                          |                          |                          |                          |                          |                          |
|--------------------------|--------------------------|--------------------------|--------------------------|--------------------------|--------------------------|--------------------------|--------------------------|
| <input type="checkbox"/> | <input type="checkbox"/> | <input type="checkbox"/> | <input type="checkbox"/> | <input type="checkbox"/> | <input type="checkbox"/> | <input type="checkbox"/> | <input type="checkbox"/> |
|--------------------------|--------------------------|--------------------------|--------------------------|--------------------------|--------------------------|--------------------------|--------------------------|

PEPERONI

|                          |                          |                          |                          |                          |                          |                          |                          |
|--------------------------|--------------------------|--------------------------|--------------------------|--------------------------|--------------------------|--------------------------|--------------------------|
| <input type="checkbox"/> | <input type="checkbox"/> | <input type="checkbox"/> | <input type="checkbox"/> | <input type="checkbox"/> | <input type="checkbox"/> | <input type="checkbox"/> | <input type="checkbox"/> |
|--------------------------|--------------------------|--------------------------|--------------------------|--------------------------|--------------------------|--------------------------|--------------------------|

OLIVE DA TAVOLA

|                          |                          |                          |                          |                          |                          |                          |                          |
|--------------------------|--------------------------|--------------------------|--------------------------|--------------------------|--------------------------|--------------------------|--------------------------|
| <input type="checkbox"/> | <input type="checkbox"/> | <input type="checkbox"/> | <input type="checkbox"/> | <input type="checkbox"/> | <input type="checkbox"/> | <input type="checkbox"/> | <input type="checkbox"/> |
|--------------------------|--------------------------|--------------------------|--------------------------|--------------------------|--------------------------|--------------------------|--------------------------|

FONDO DEL PIATTO

PIATTO INTERO

PIATTO ABBONDANTE



QUANTE VOLTE HAI MANGIATO IN MEDIA I SEGUENTI CIBI LO SCORSO ANNO?

QUANTO È GRANDE LA PORZIONE DI CIBO CHE DI SOLITO MANGI PER PASTO?

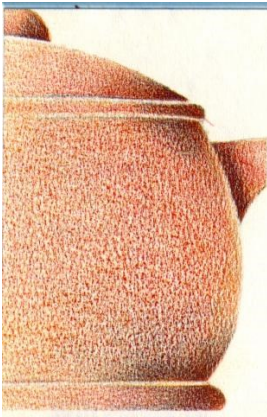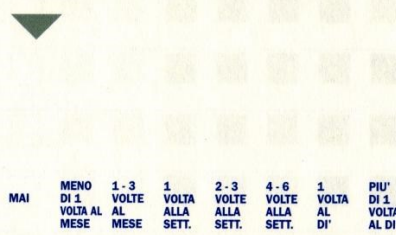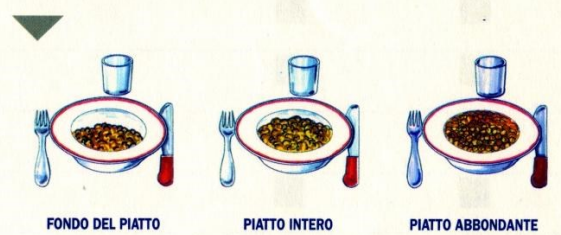

CECI - LENTICCHIE - FAGIOLI da soli o con pasta o riso

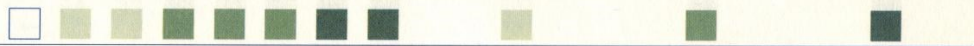

PISELLI da soli o con pasta o riso

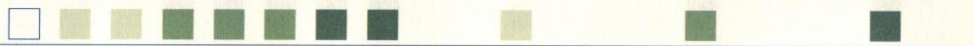

FAGIOLINI da soli o con pasta quando è il periodo

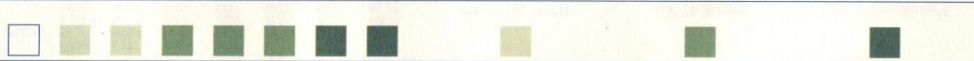

FAVE CON VERDURA

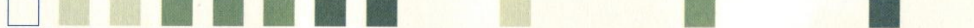

QUANTE VOLTE HAI MANGIATO IN MEDIA I SEGUENTI CIBI LO SCORSO ANNO?

QUANTO È GRANDE LA PORZIONE DI CIBO CHE DI SOLITO MANGI PER PASTO?

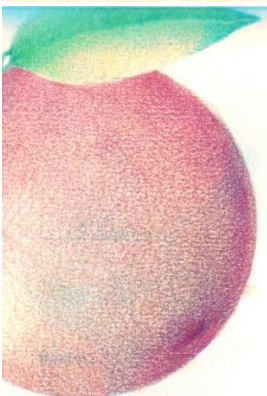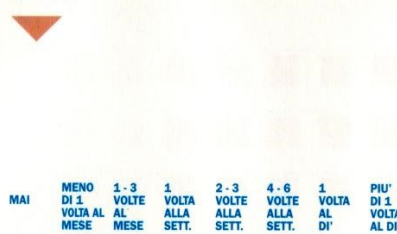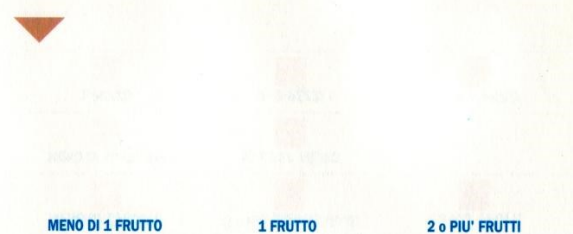

ARANCE - MANDARINI - POMPELMI quando è il periodo

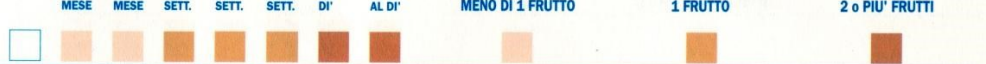

PESCHE quando è il periodo

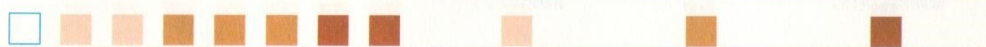

FICHI quando è il periodo

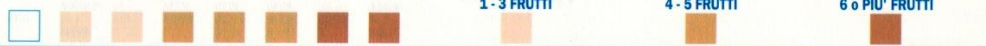

ALBICOCHE quando è il periodo

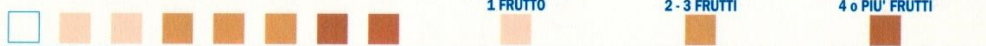

UVA quando è il periodo

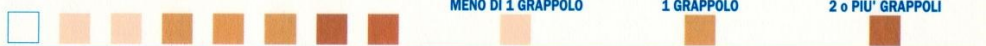

ANGURIA (melone rosso) quando è il periodo

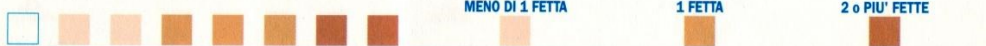

MELONE GIALLO quando è il periodo

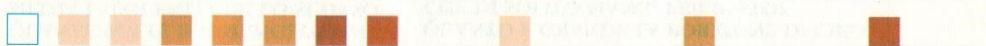

MELE - PERE

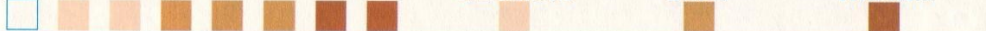



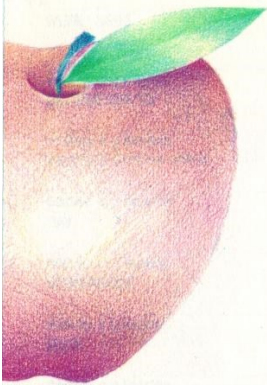

## frutta

18

QUANTE VOLTE HAI MANGIATO IN MEDIA I SEGUENTI CIBI LO SCORSO ANNO?

QUANTO È GRANDE LA PORZIONE DI CIBO CHE DI SOLITO MANGI PER PASTO?

|                                | MAI                      | MENO DI 1 VOLTA AL MESE  | 1-3 VOLTE AL MESE        | 1 VOLTA ALLA SETT.       | 2-3 VOLTE ALLA SETT.     | 4-6 VOLTE ALLA SETT.     | 1 VOLTA AL DI'           | PIU' DI 1 VOLTA AL DI'   |  | MENO DI 1 FRUTTO         | 1 FRUTTO                 | 2 o PIU' FRUTTI          |
|--------------------------------|--------------------------|--------------------------|--------------------------|--------------------------|--------------------------|--------------------------|--------------------------|--------------------------|--|--------------------------|--------------------------|--------------------------|
| KIWI                           | <input type="checkbox"/> | <input type="checkbox"/> | <input type="checkbox"/> | <input type="checkbox"/> | <input type="checkbox"/> | <input type="checkbox"/> | <input type="checkbox"/> | <input type="checkbox"/> |  | <input type="checkbox"/> | <input type="checkbox"/> | <input type="checkbox"/> |
| CILIEGE<br>quando è il periodo | <input type="checkbox"/> | <input type="checkbox"/> | <input type="checkbox"/> | <input type="checkbox"/> | <input type="checkbox"/> | <input type="checkbox"/> | <input type="checkbox"/> | <input type="checkbox"/> |  | <input type="checkbox"/> | <input type="checkbox"/> | <input type="checkbox"/> |
| BANANE                         | <input type="checkbox"/> | <input type="checkbox"/> | <input type="checkbox"/> | <input type="checkbox"/> | <input type="checkbox"/> | <input type="checkbox"/> | <input type="checkbox"/> | <input type="checkbox"/> |  | <input type="checkbox"/> | <input type="checkbox"/> | <input type="checkbox"/> |
| FRUTTA SECCA                   | <input type="checkbox"/> | <input type="checkbox"/> | <input type="checkbox"/> | <input type="checkbox"/> | <input type="checkbox"/> | <input type="checkbox"/> | <input type="checkbox"/> | <input type="checkbox"/> |  | <input type="checkbox"/> | <input type="checkbox"/> | <input type="checkbox"/> |
| FRUTTA SCIROPATA               | <input type="checkbox"/> | <input type="checkbox"/> | <input type="checkbox"/> | <input type="checkbox"/> | <input type="checkbox"/> | <input type="checkbox"/> | <input type="checkbox"/> | <input type="checkbox"/> |  | <input type="checkbox"/> | <input type="checkbox"/> | <input type="checkbox"/> |

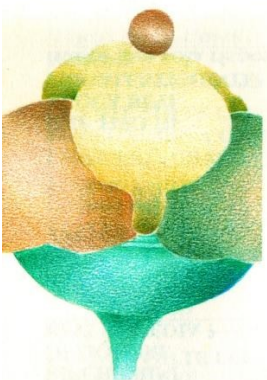

## alimenti vari

19

QUANTE VOLTE HAI MANGIATO IN MEDIA I SEGUENTI CIBI LO SCORSO ANNO?

QUANTO È GRANDE LA PORZIONE DI CIBO CHE DI SOLITO MANGI PER PASTO?

|                                                                | MAI                      | MENO DI 1 VOLTA AL MESE  | 1-3 VOLTE AL MESE        | 1 VOLTA ALLA SETT.       | 2-3 VOLTE ALLA SETT.     | 4-6 VOLTE ALLA SETT.     | 1 VOLTA AL DI'           | PIU' DI 1 VOLTA AL DI'   |  | 1 BOTTIGLIETTA           | 2 o PIU' BOTTIGLIETTE    |
|----------------------------------------------------------------|--------------------------|--------------------------|--------------------------|--------------------------|--------------------------|--------------------------|--------------------------|--------------------------|--|--------------------------|--------------------------|
| SUCCHI DI FRUTTA                                               | <input type="checkbox"/> | <input type="checkbox"/> | <input type="checkbox"/> | <input type="checkbox"/> | <input type="checkbox"/> | <input type="checkbox"/> | <input type="checkbox"/> | <input type="checkbox"/> |  | <input type="checkbox"/> | <input type="checkbox"/> |
| COCA COLA - ARANCIATA - CHINOTTO<br>nel periodo estivo         | <input type="checkbox"/> | <input type="checkbox"/> | <input type="checkbox"/> | <input type="checkbox"/> | <input type="checkbox"/> | <input type="checkbox"/> | <input type="checkbox"/> | <input type="checkbox"/> |  | <input type="checkbox"/> | <input type="checkbox"/> |
| COCA COLA - ARANCIATA - CHINOTTO<br>escluso nel periodo estivo | <input type="checkbox"/> | <input type="checkbox"/> | <input type="checkbox"/> | <input type="checkbox"/> | <input type="checkbox"/> | <input type="checkbox"/> | <input type="checkbox"/> | <input type="checkbox"/> |  | <input type="checkbox"/> | <input type="checkbox"/> |
| CARAMELLE                                                      | <input type="checkbox"/> | <input type="checkbox"/> | <input type="checkbox"/> | <input type="checkbox"/> | <input type="checkbox"/> | <input type="checkbox"/> | <input type="checkbox"/> | <input type="checkbox"/> |  | <input type="checkbox"/> | <input type="checkbox"/> |
| CIOCCOLATA                                                     | <input type="checkbox"/> | <input type="checkbox"/> | <input type="checkbox"/> | <input type="checkbox"/> | <input type="checkbox"/> | <input type="checkbox"/> | <input type="checkbox"/> | <input type="checkbox"/> |  | <input type="checkbox"/> | <input type="checkbox"/> |
| PASTICCERIA<br>torte o pasticcini                              | <input type="checkbox"/> | <input type="checkbox"/> | <input type="checkbox"/> | <input type="checkbox"/> | <input type="checkbox"/> | <input type="checkbox"/> | <input type="checkbox"/> | <input type="checkbox"/> |  | <input type="checkbox"/> | <input type="checkbox"/> |
| GELATO<br>solo nel periodo estivo                              | <input type="checkbox"/> | <input type="checkbox"/> | <input type="checkbox"/> | <input type="checkbox"/> | <input type="checkbox"/> | <input type="checkbox"/> | <input type="checkbox"/> | <input type="checkbox"/> |  | <input type="checkbox"/> | <input type="checkbox"/> |
| BISCOTTI - PASTE SECCHE                                        | <input type="checkbox"/> | <input type="checkbox"/> | <input type="checkbox"/> | <input type="checkbox"/> | <input type="checkbox"/> | <input type="checkbox"/> | <input type="checkbox"/> | <input type="checkbox"/> |  | <input type="checkbox"/> | <input type="checkbox"/> |



**QUANTO VINO BEVI IN MEDIA?**

NON NE BEVO O NE BEVO SALTUARIAMENTE     MEZZO BICCHIERE AL GIORNO     1 BICCHIERE AL GIORNO     2 - 3 BICCHIERI AL GIORNO     4 - 5 BICCHIERI AL GIORNO     PIU' DI 5 BICCHIERI AL GIORNO

---

**QUANTA BIRRA BEVI IN MEDIA? escluso nel periodo estivo**

NON NE BEVO O NE BEVO SALTUARIAMENTE     CIRCA UNA BOTTIGLIA PICCOLA DA UN TERZO AL GIORNO     CIRCA UNA BOTTIGLIA GRANDE DA DUE TERZI AL GIORNO     PIU' DI UNA BOTTIGLIA GRANDE AL GIORNO

---

**QUANTI BICCHIERINI DI LIQUORE BEVI IN MEDIA?**

NON NE BEVO O NE BEVO MENO DI UNO ALLA SETTIMANA     1 - 2 ALLA SETTIMANA     3 - 5 ALLA SETTIMANA     6 - 7 ALLA SETTIMANA     1 - 3 AL GIORNO     PIU' DI 3 AL GIORNO

---

**QUANTA ACQUA BEVI IN MEDIA? escluso nel periodo estivo**

NON NE BEVO O NE BEVO SALTUARIAMENTE     1 - 2 BICCHIERI AL GIORNO     3 - 4 BICCHIERI AL GIORNO     CIRCA UN LITRO AL GIORNO     UN LITRO E MEZZO AL GIORNO     CIRCA 2 LITRI AL GIORNO

---

**CHE TIPO DI ACQUA BEVI PREVALENTEMENTE? indica una sola risposta**

DI ACQUEDOTTO     DI POZZO     MINERALE

dai una risposta a tutti i condimenti elencati

olio e grassi

**QUANTE VOLTE USI PER CONDIRE A CRUDO I SEGUENTI GRASSI?**

MAI     MENO DI 1 VOLTA A SETTIMANA     1 VOLTA A SETTIMANA     2 - 3 VOLTE A SETTIMANA     4 - 6 VOLTE A SETTIMANA     10 PIU' VOLTE AL GIORNO

BURRO                    

MARGARINA                    

OLIO DI OLIVA                    

OLIO DI SEMI                    

---

**QUANTE VOLTE USI PER FRIGGERE I SEGUENTI GRASSI?**

MAI     MENO DI 1 VOLTA A SETTIMANA     1 VOLTA A SETTIMANA     2 - 3 VOLTE A SETTIMANA     4 - 6 VOLTE A SETTIMANA     10 PIU' VOLTE AL GIORNO

BURRO                    

MARGARINA                    

OLIO DI OLIVA                    

OLIO DI SEMI                    

---

**QUANTE VOLTE USI PER CUCINARE I SEGUENTI GRASSI (escluso la frittura)?**

MAI     MENO DI 1 VOLTA A SETTIMANA     1 VOLTA A SETTIMANA     2 - 3 VOLTE A SETTIMANA     4 - 6 VOLTE A SETTIMANA     10 PIU' VOLTE AL GIORNO

BURRO                    

MARGARINA                    

OLIO DI OLIVA                    

OLIO DI SEMI                    

QUANTI LITRI DI OLIO DI OLIVA SI CONSUMANO IN CASA TUA IN UN ANNO? \_\_\_\_\_

DI SOLITO, IN UN GIORNO FERIALE IN QUANTI SIETE A TAVOLA COMPRESO TE? \_\_\_\_\_



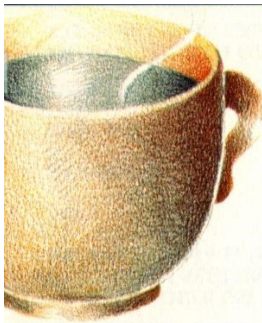

BEVI CAFFÈ?  
(compreso quello aggiunto al latte) NO  SI

SE SÌ, quante tazzine di caffè bevi in media al giorno? \_\_\_\_\_

BEVI CAFFÈ D'ORZO? NO  SI

SE SÌ, quante tazze di caffè d'orzo bevi in media al giorno? \_\_\_\_\_

FAI USO DI ZUCCHERO? NO  SI

SE SÌ, quanti cucchiaini di zucchero consumi durante la giornata? \_\_\_\_\_

Rispondi a questa domanda solo se ti capita almeno una volta l'anno di mangiare fuori casa (da parenti, da amici, al ristorante):  
COME TROVI IL CIBO PREPARATO FUORI CASA?

troppo salato  senza sale  salato normalmente

attività fisica

Le seguenti domande si riferiscono all'anno precedente la compilazione di questo questionario e riguardano le attività che sei solito svolgere durante una tua tipica giornata feriale, quindi escluse le domeniche e i giorni festivi.

A CHE ORA VAI A LETTO DI SOLITO? \_\_\_\_\_

A CHE ORA TI ALZI DI SOLITO? \_\_\_\_\_

FAI UN RIPOSO DURANTE IL POMERIGGIO? NO  SI

SE SÌ, quanto tempo dura in media il tuo riposo pomeridiano? ORE \_\_\_\_\_ MINUTI \_\_\_\_\_

DURANTE LA TUA GIORNATA TI DEDICHI ALLA CUCINA O LAVI I PIATTI? NO  SI

SE SÌ, quanto tempo al giorno dedichi in media alla cucina o a lavare i piatti? ORE \_\_\_\_\_ MINUTI \_\_\_\_\_

DURANTE LA TUA GIORNATA TI DEDICHI ALLA PULIZIA DELLA CASA? spolveri, lavi indumenti, pulisci i vetri, lavi e lucidi i pavimenti, ecc. NO  SI

SE SÌ, quanto tempo dedichi in media ai lavori di pulizia della casa? ORE \_\_\_\_\_ MINUTI \_\_\_\_\_

NEL TUO TEMPO LIBERO, QUINDI NON PER LAVORO, VAI IN CAMPAGNA O IN GIARDINO A COLTIVARE LA TERRA? zappi, tagli erbacce, piante verdure, poti alberi, raccogli frutta, ecc. NO  SI

SE SÌ, quanto tempo dedichi in media durante una tua giornata feriale a coltivare la terra o a fare giardinaggio? ORE \_\_\_\_\_ MINUTI \_\_\_\_\_



Le seguenti domande si riferiscono all'anno precedente la compilazione di questo questionario e riguardano le attività che sei solito svolgere durante una tua tipica giornata feriale, quindi escluse le domeniche e i giorni festivi.

**DURANTE LA TUA GIORNATA FERIALE ESCI DI CASA PER PASSEGGIARE, FARE COMPERE O CAMMINARE IN GENERE?**

NO  SI

**SE SI**, per quanto tempo in media al giorno sei fuori casa per passeggiare, fare compere o camminare in genere?

ORE \_\_\_\_\_ MINUTI \_\_\_\_\_

**HAI UN PASTATEMPO? escluso le passeggiate**

NO  SI

**SE SI**, quale? \_\_\_\_\_

quante volte alla settimana ti dedichi al tuo passatempo? \_\_\_\_\_

quanto tempo in media dedichi ogni volta al tuo passatempo? \_\_\_\_\_

ORE \_\_\_\_\_ MINUTI \_\_\_\_\_

**USI DI SOLITO LA BICICLETTA PER SPOSTARTI O FARE PASSEGGIATE?**

NO  SI

**SE SI**, quante volte alla settimana? \_\_\_\_\_

quanto tempo in media vai ogni volta in bicicletta? \_\_\_\_\_

ORE \_\_\_\_\_ MINUTI \_\_\_\_\_

**FAI ESERCIZI DI GINNASTICA?**

NO  SI

**SE SI**, quante volte durante la settimana fai esercizi di ginnastica? \_\_\_\_\_

quanto tempo dedichi in media ogni volta ai tuoi esercizi di ginnastica? \_\_\_\_\_

ORE \_\_\_\_\_ MINUTI \_\_\_\_\_



Questionario a cura del:

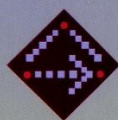

LABORATORIO  
DI EPIDEMIOLOGIA  
E BIostatistica

I.R.C.C.S. "S. De Bellis"  
Ospedale Gastroenterologico

Via Valente, 4 - 70013 Castellana (Ba) - Tel. (080) 8961394
